# Supplementary material for: Knockdown of EphB1 receptor decreases medulloblastoma cell growth and migration and increases cellular radiosensitization
Source: PubMed Central journal article supplement (PMC4496193; doi:10.18632/oncotarget.3369), 2015-03-30
Supplement: oncotarget-06-8929-s001.pdf [file oncotarget-06-8929-s001.pdf]

## SUPPLEMENTARY FIGURES

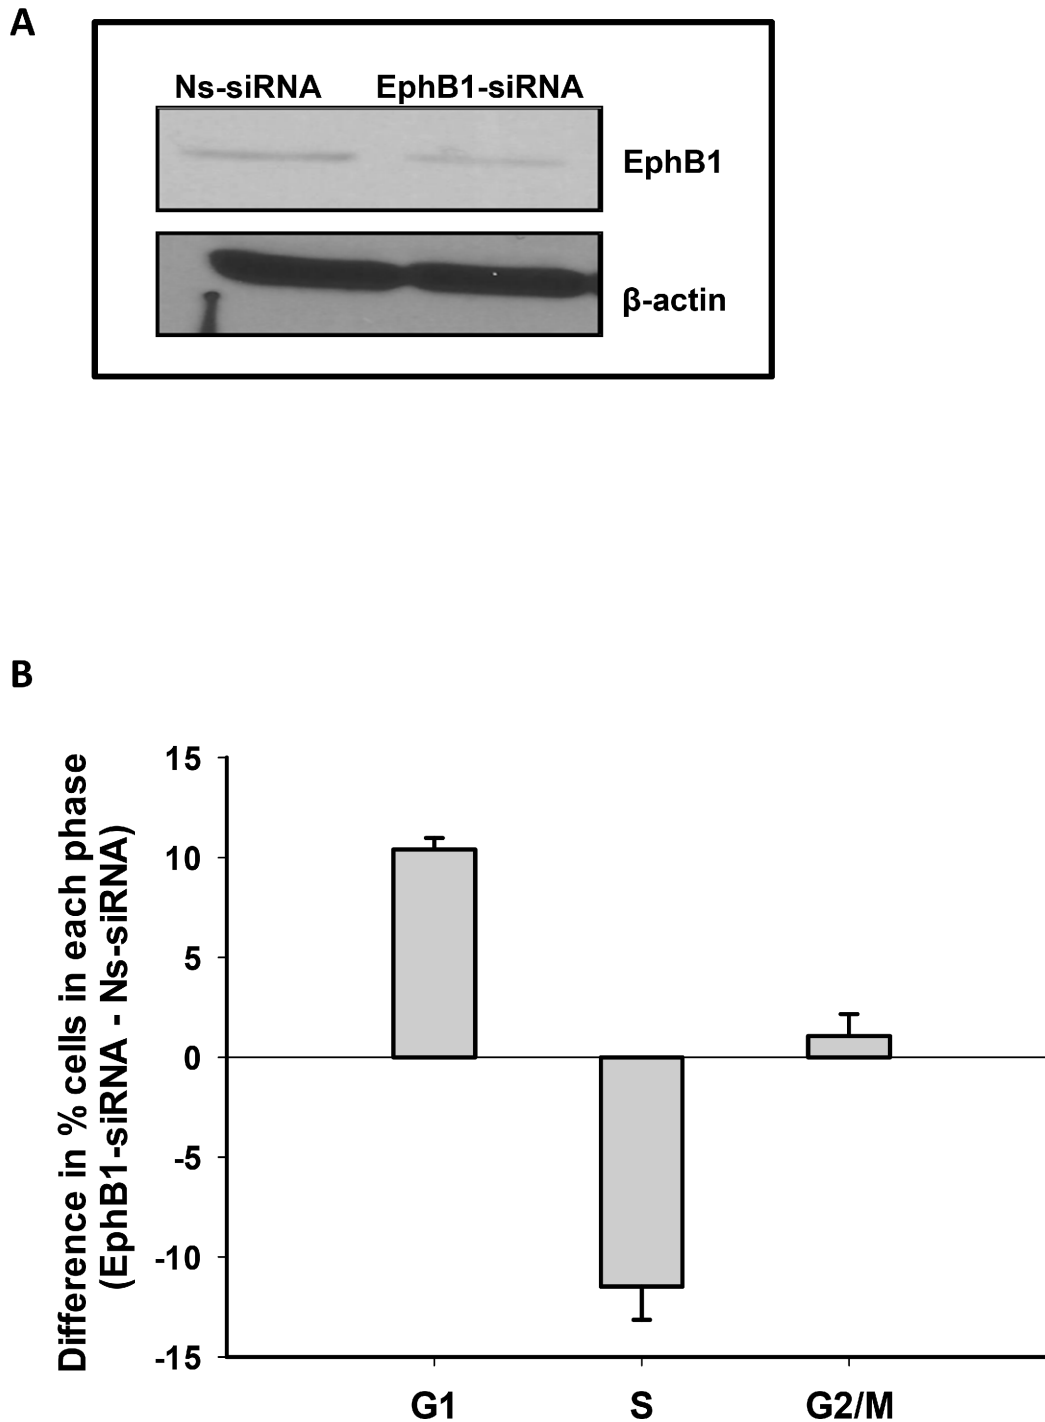

**Supplementary Figure 1: EphB1 knockdown increases the percentage of cells in G1 phase in UW228 cells.** (A) EphB1 expression is detected by western blotting in UW228 cells, which is decreased upon transfection with the EphB1-targeting siRNA vs. the control non-specific (Ns-siRNA). (B) Knockdown of EphB1 receptor increases the percentage of cells accumulated in G1 phase of cell cycle in UW228 cells. Data represent average values  $\pm$  standard error from two independent experiments.

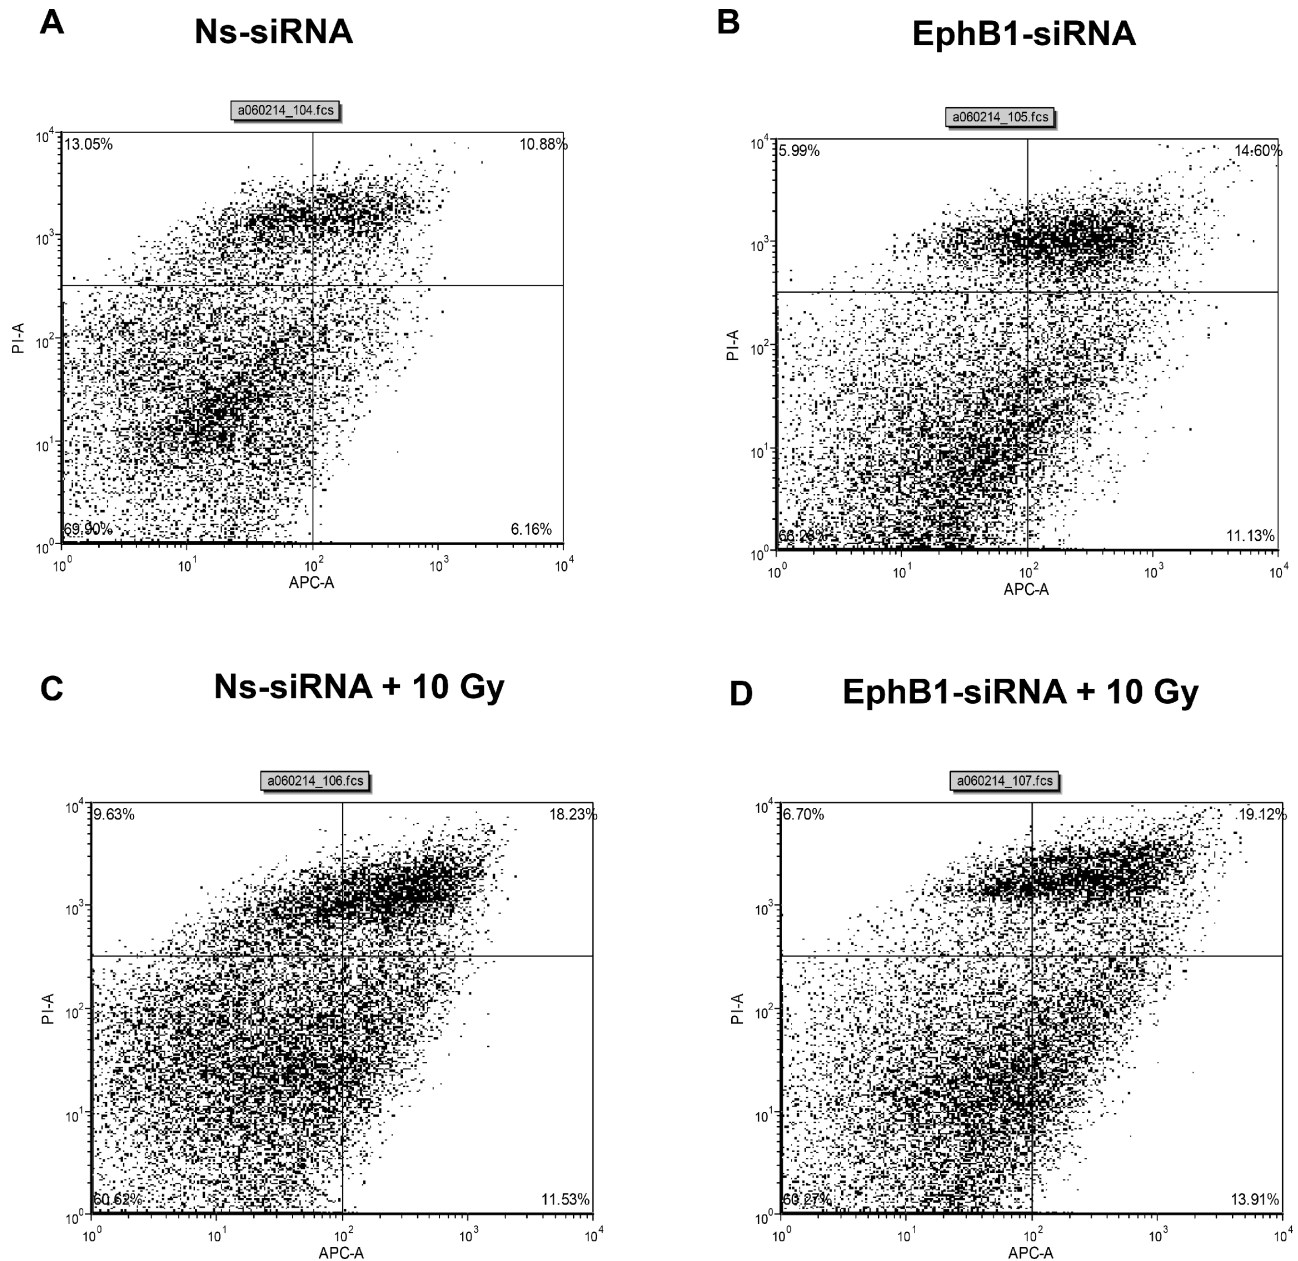

**Supplementary Figure 2: Representative images from Annexin V/Propidium iodide (PI) staining show that EphB1 knockdown combined with ionizing radiation does not significantly enhance the number of Annexin V positive cells.** DAOY cells were transfected with (A) non-specific siRNA (Ns-siRNA), (B) EphB1-siRNA, (C) Ns-siRNA with 10 Gy dose of ionizing radiation, and (D) EphB1-siRNA with 10 Gy dose of ionizing radiation. Cells were harvested 72 h post-transfection and analyzed by flow cytometry following Annexin V-PI staining.

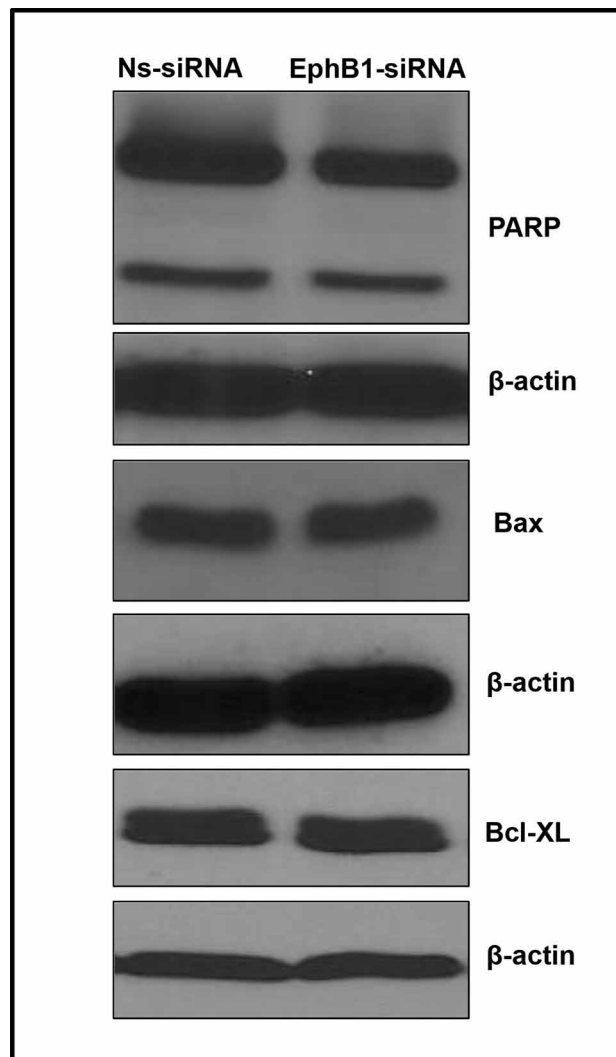

**Supplementary Figure 3: EphB1 knockdown does not affect the expression of pro- and anti-apoptotic markers.** DAOY cells were transiently transfected with non-specific siRNA (Ns-siRNA) or EphB1-targeting siRNA (EphB1-siRNA). Cell lysates were collected at 72 h post-transfection and probed against PARP, Bax, and Bcl-XL antibodies. No changes were observed in the expression of these protein markers following EphB1 knockdown.
